# Supplementary material for: Uneven recombination rate and linkage disequilibrium across a reference SNP map for common bean (Phaseolus vulgaris L.)
Source: PubMed Central journal article supplement (PMC5844515; doi:10.1371/journal.pone.0189597), 2018-03-09

**b01h**  
147.0 cM

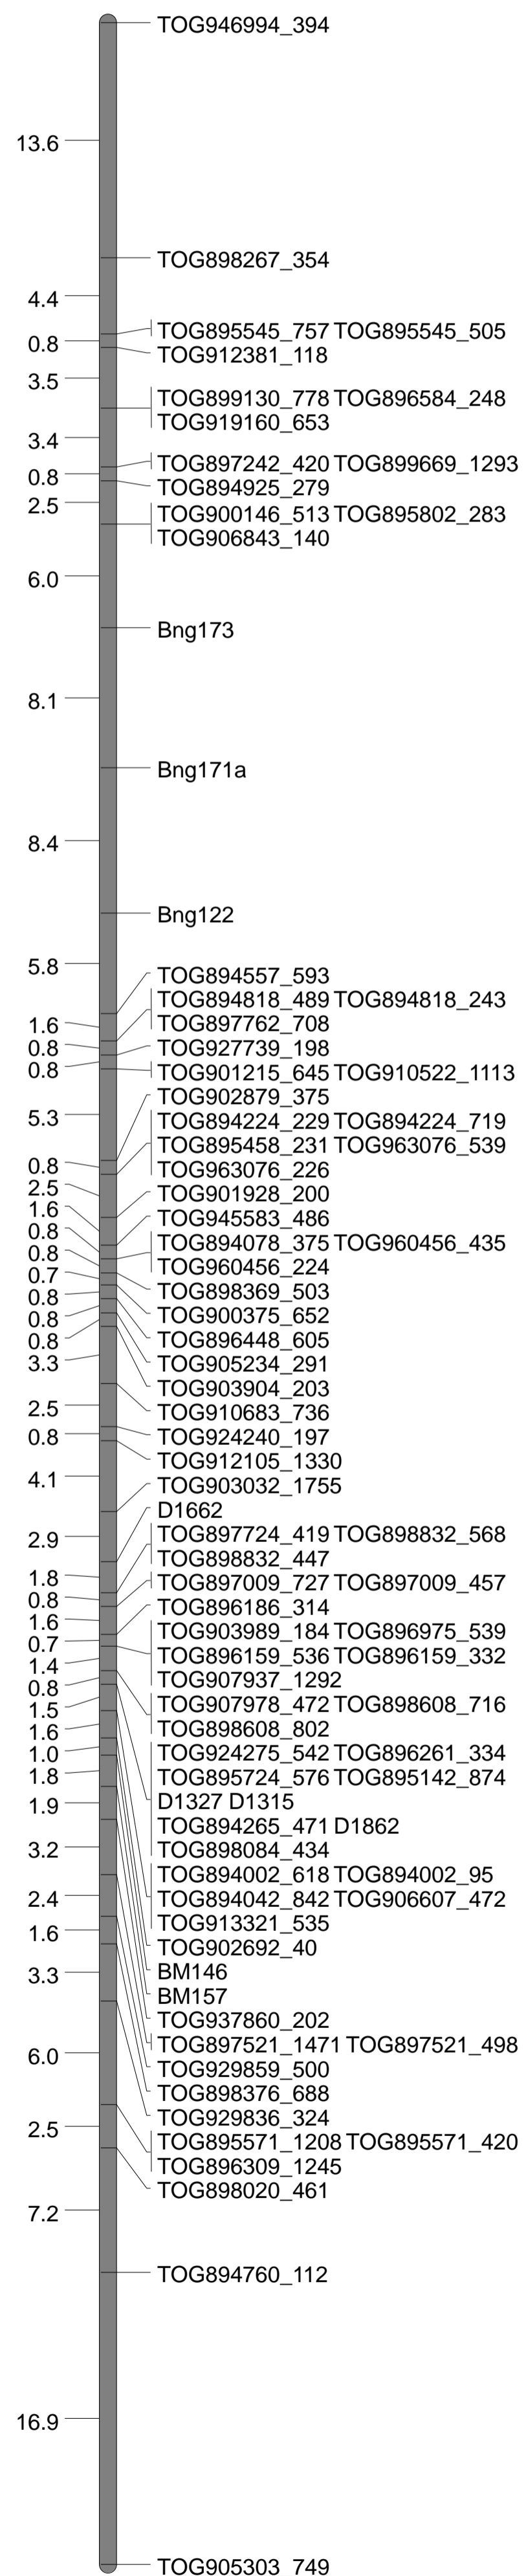

**b02d**  
140.6 cM

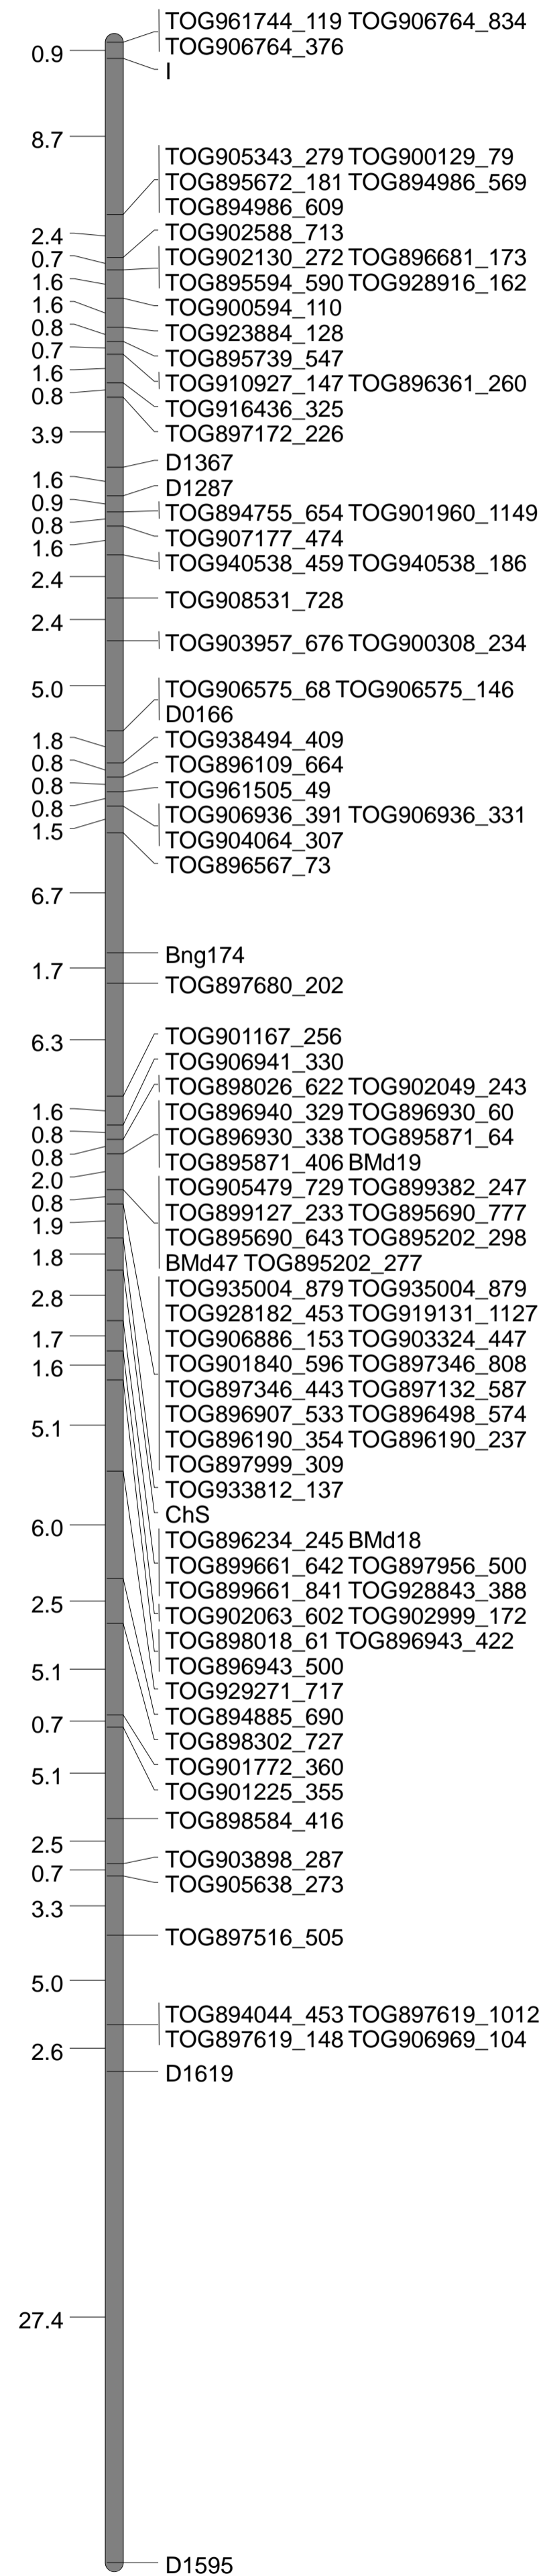

**b03c**  
114.4 cM

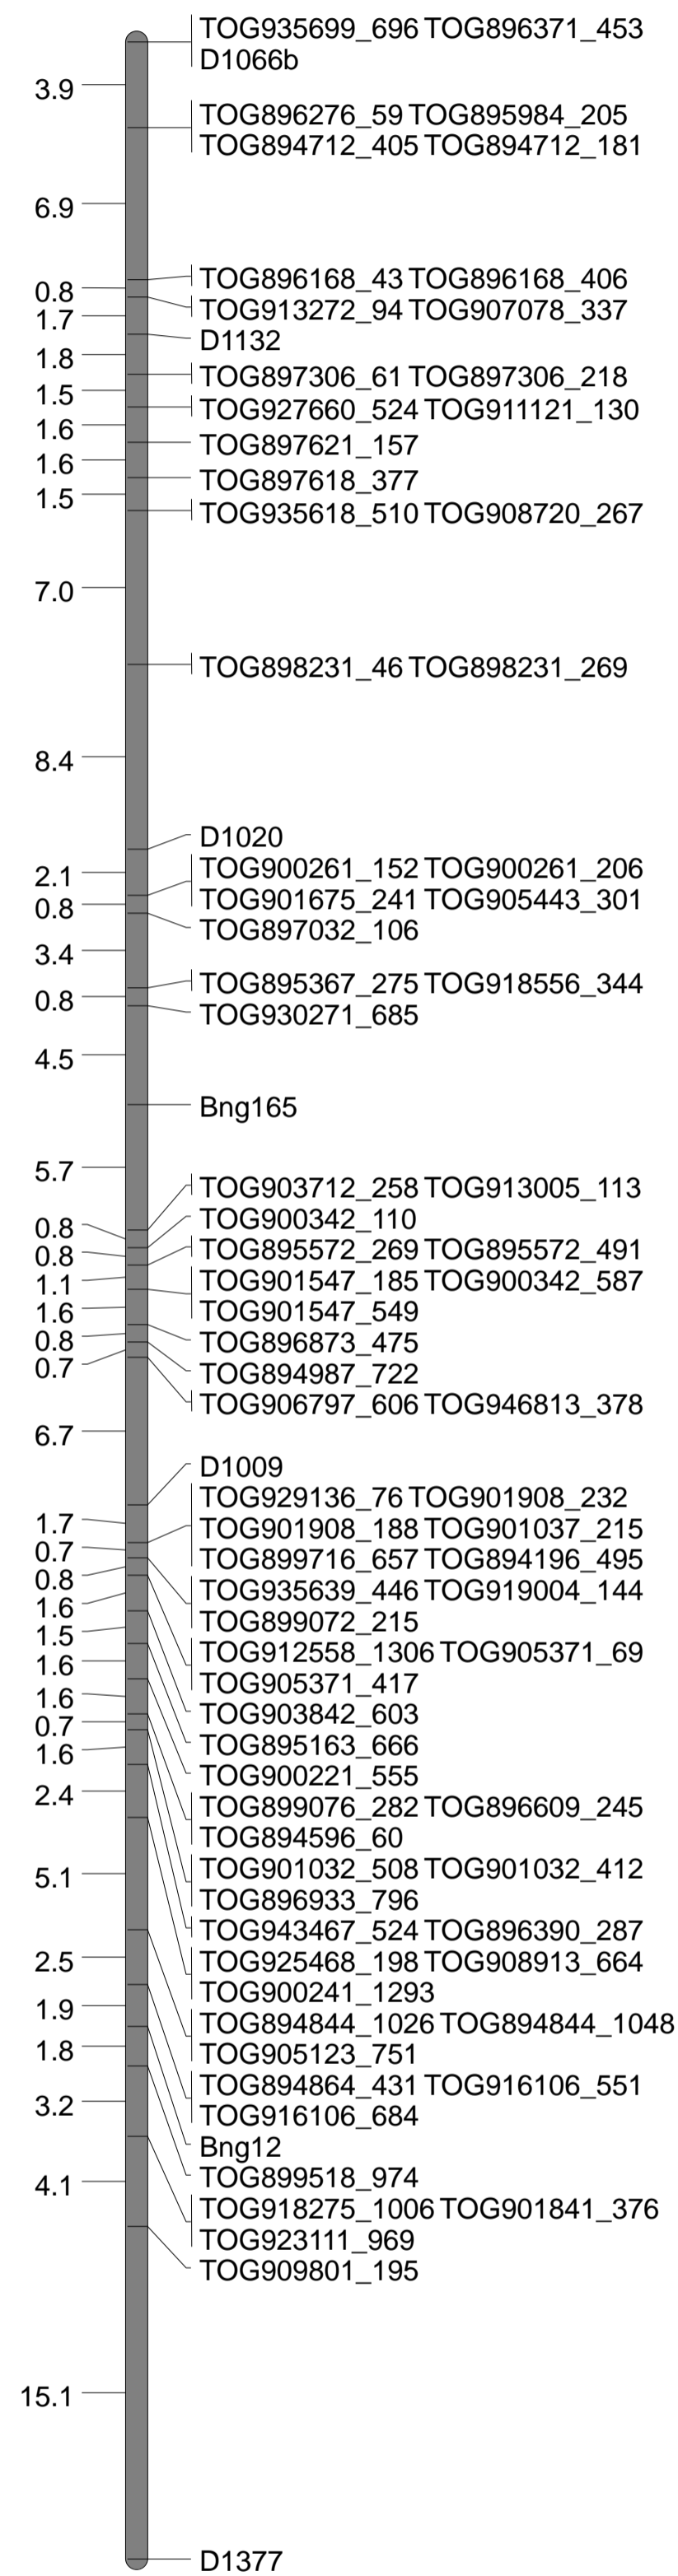

**b04c**  
84.7 cM

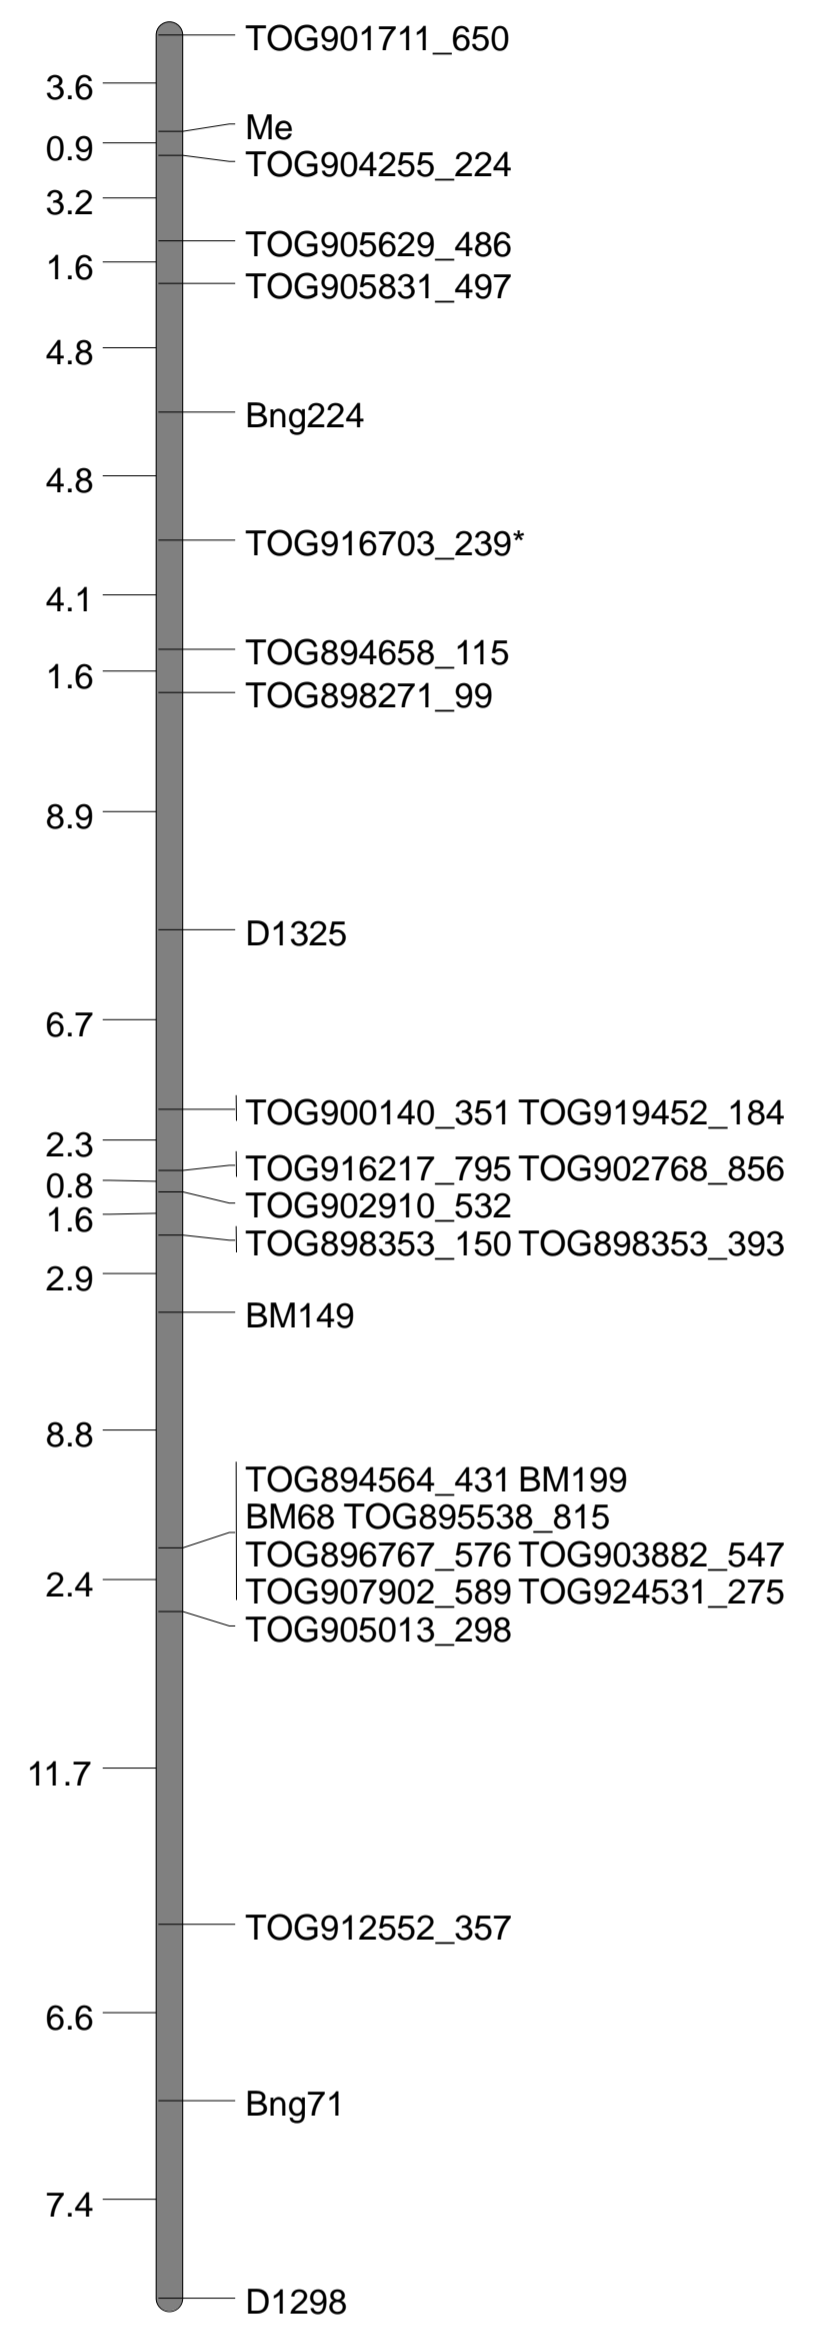

**b05e**  
82.8 cM

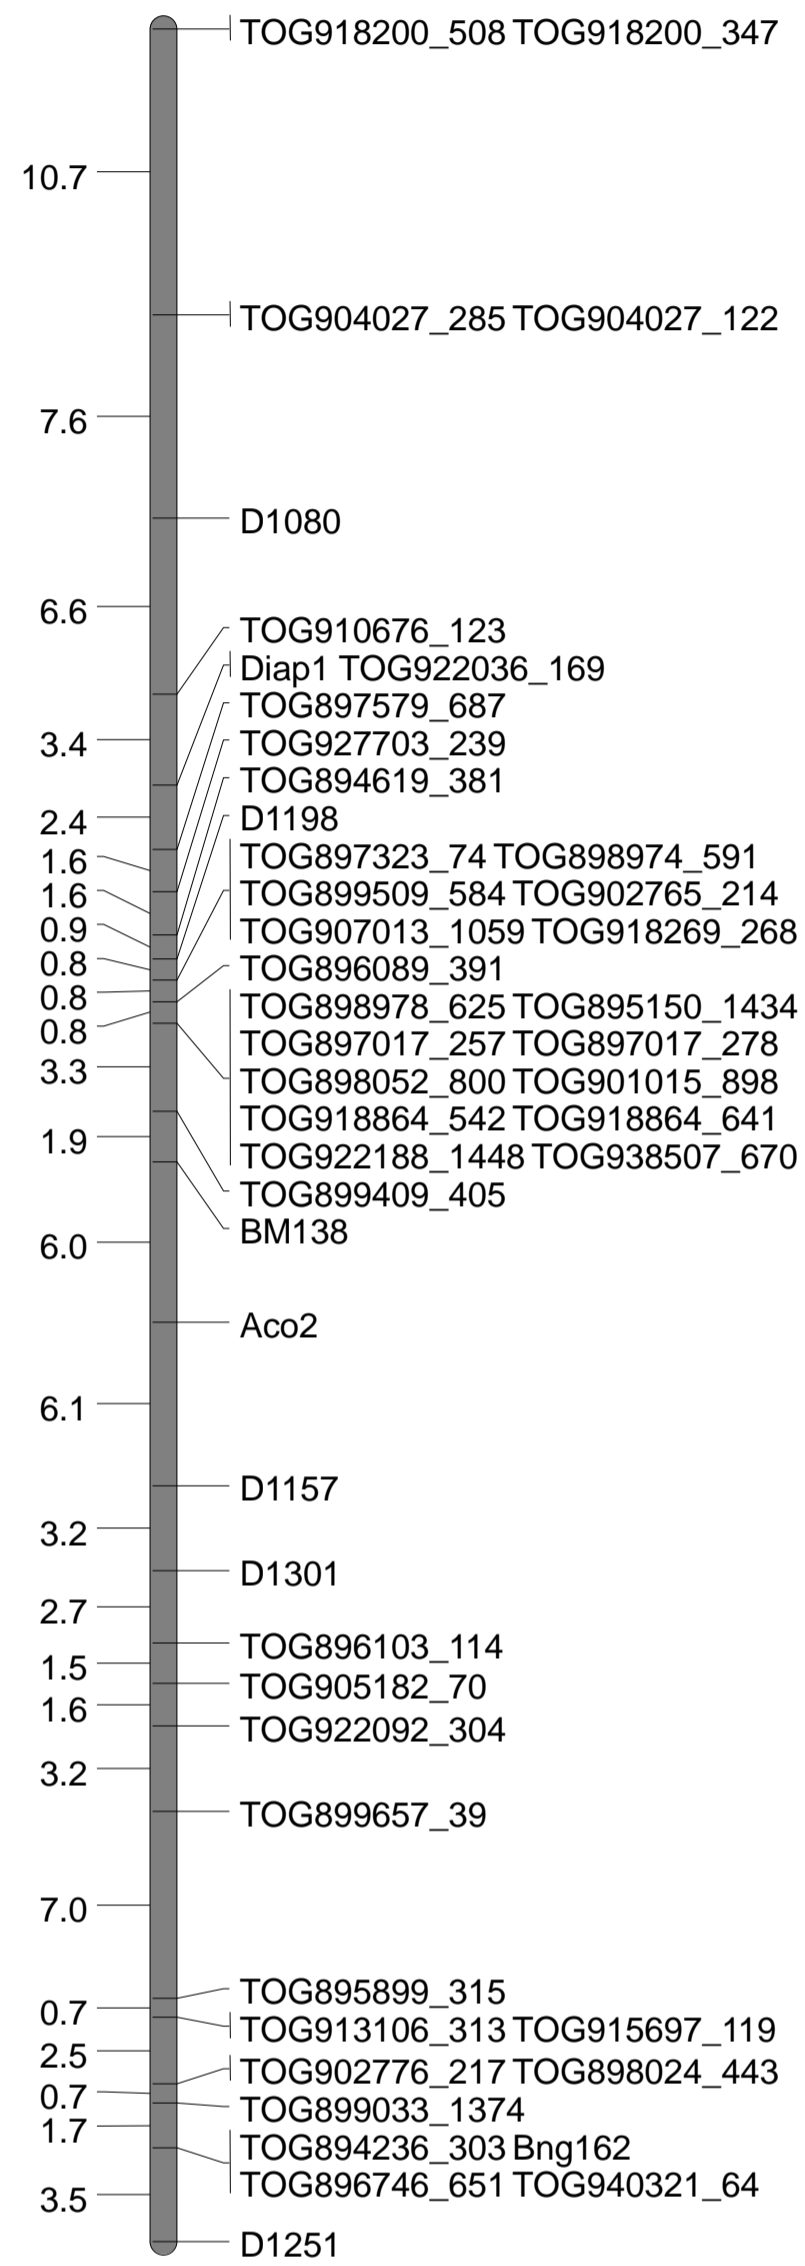

**b06g**  
83.7 cM

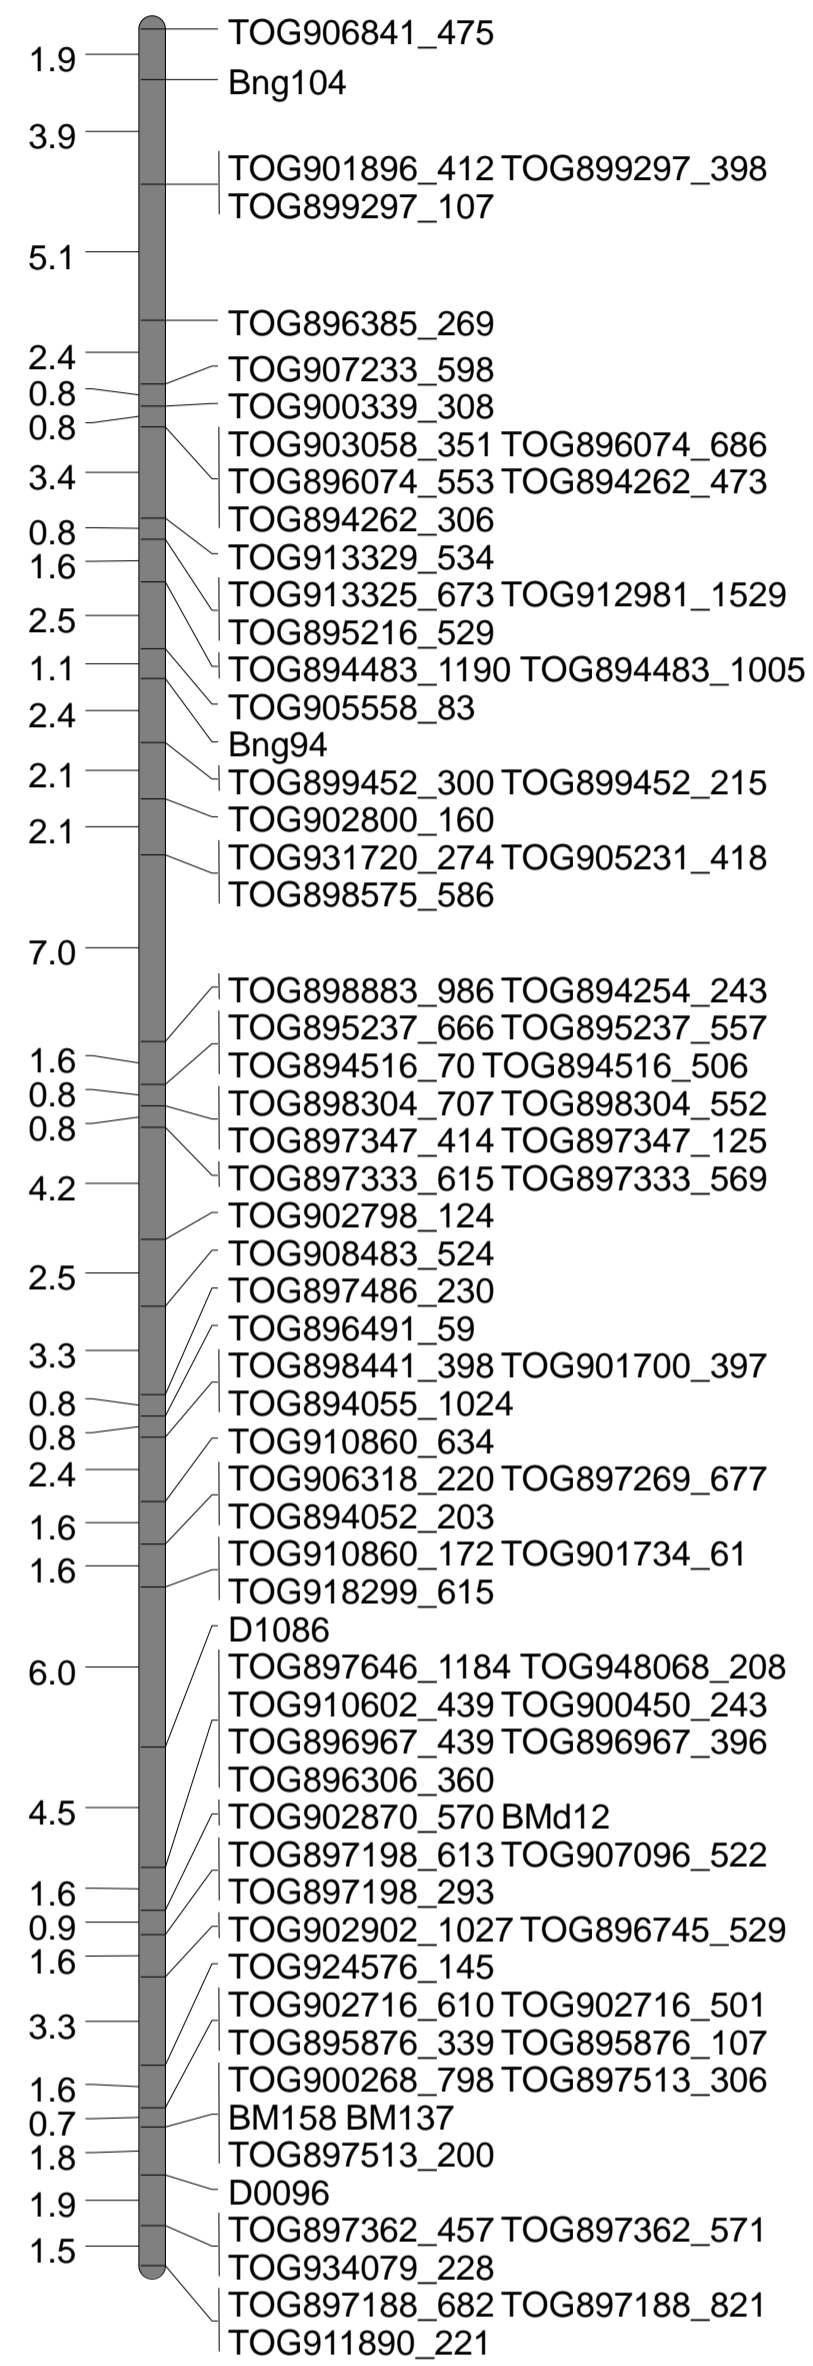

**b07a**  
108.3 cM

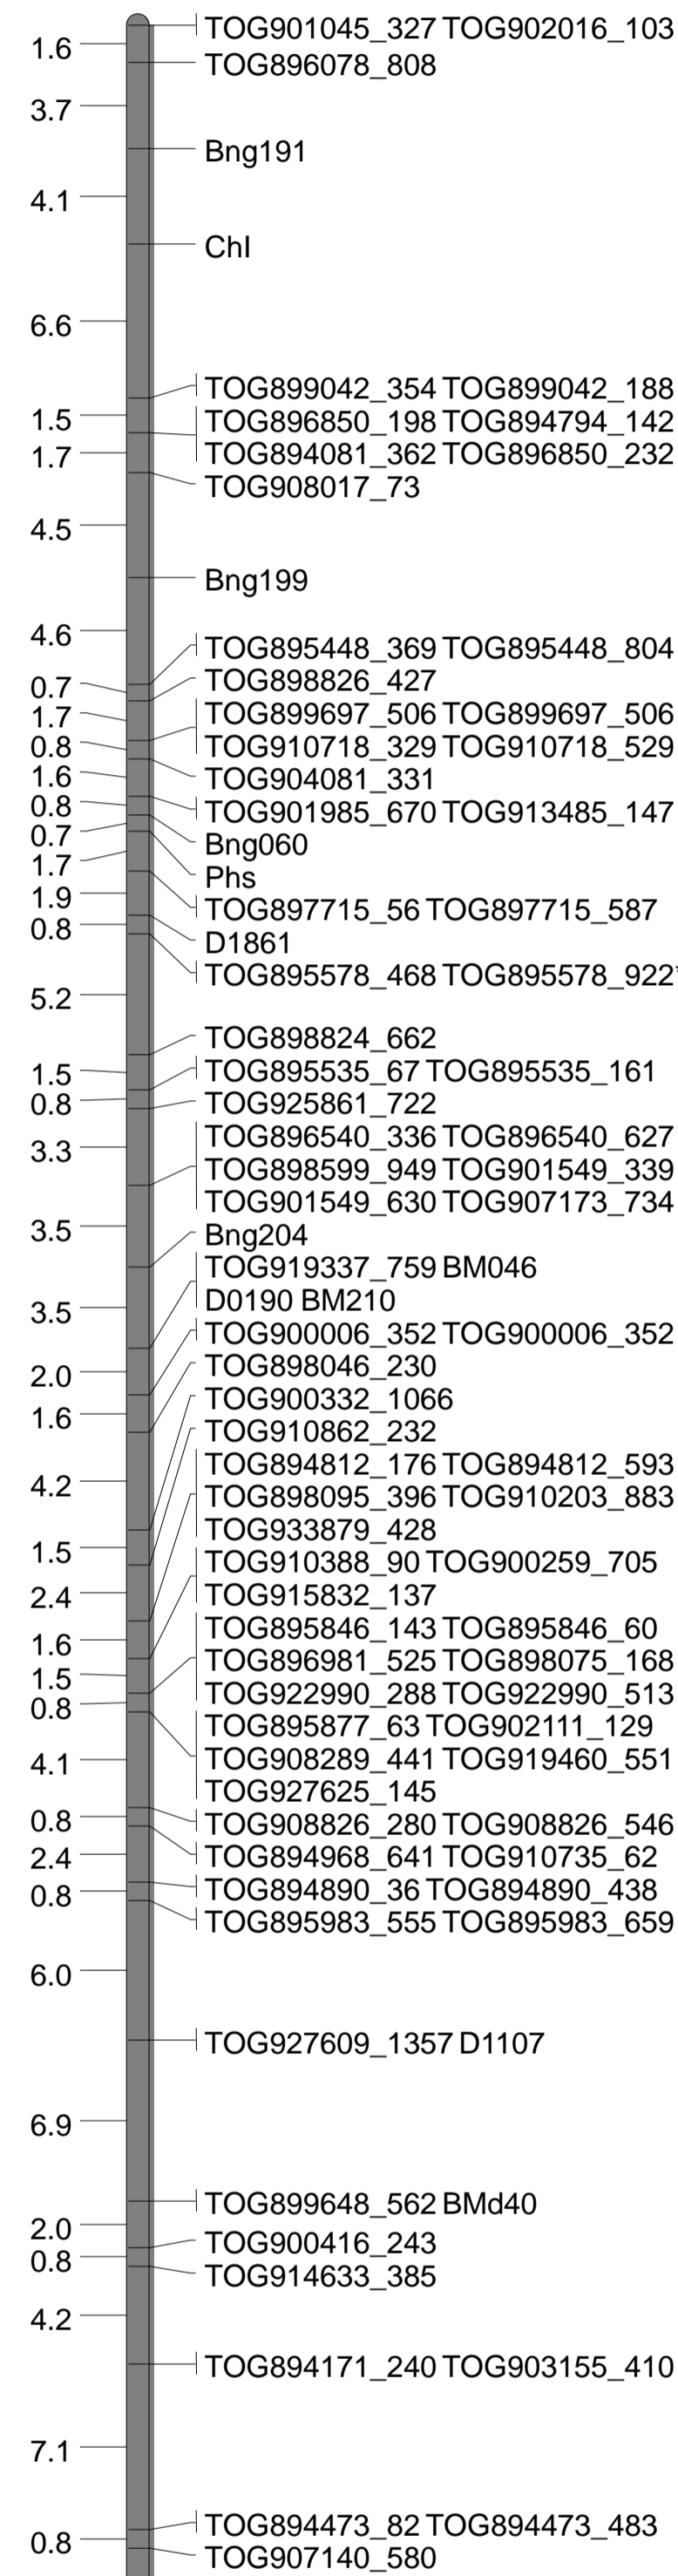

**b08f**  
99.2 cM

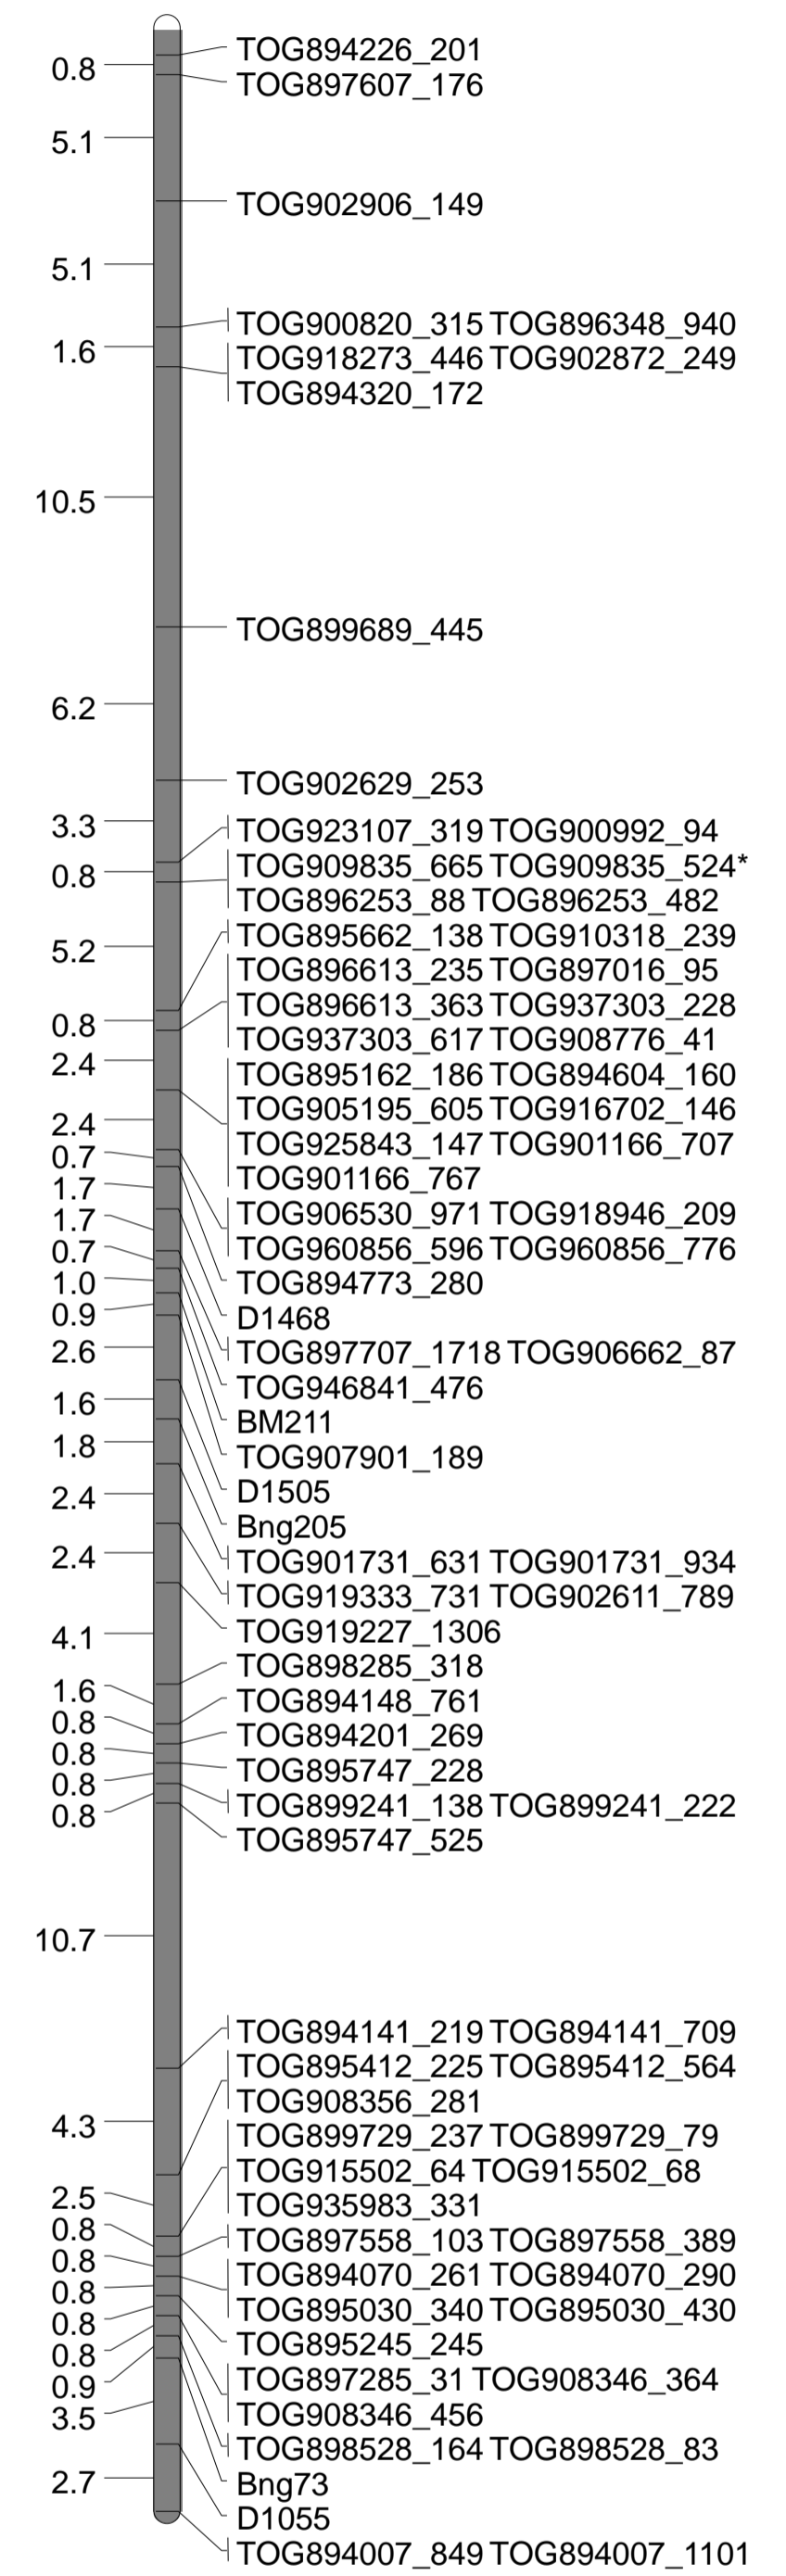

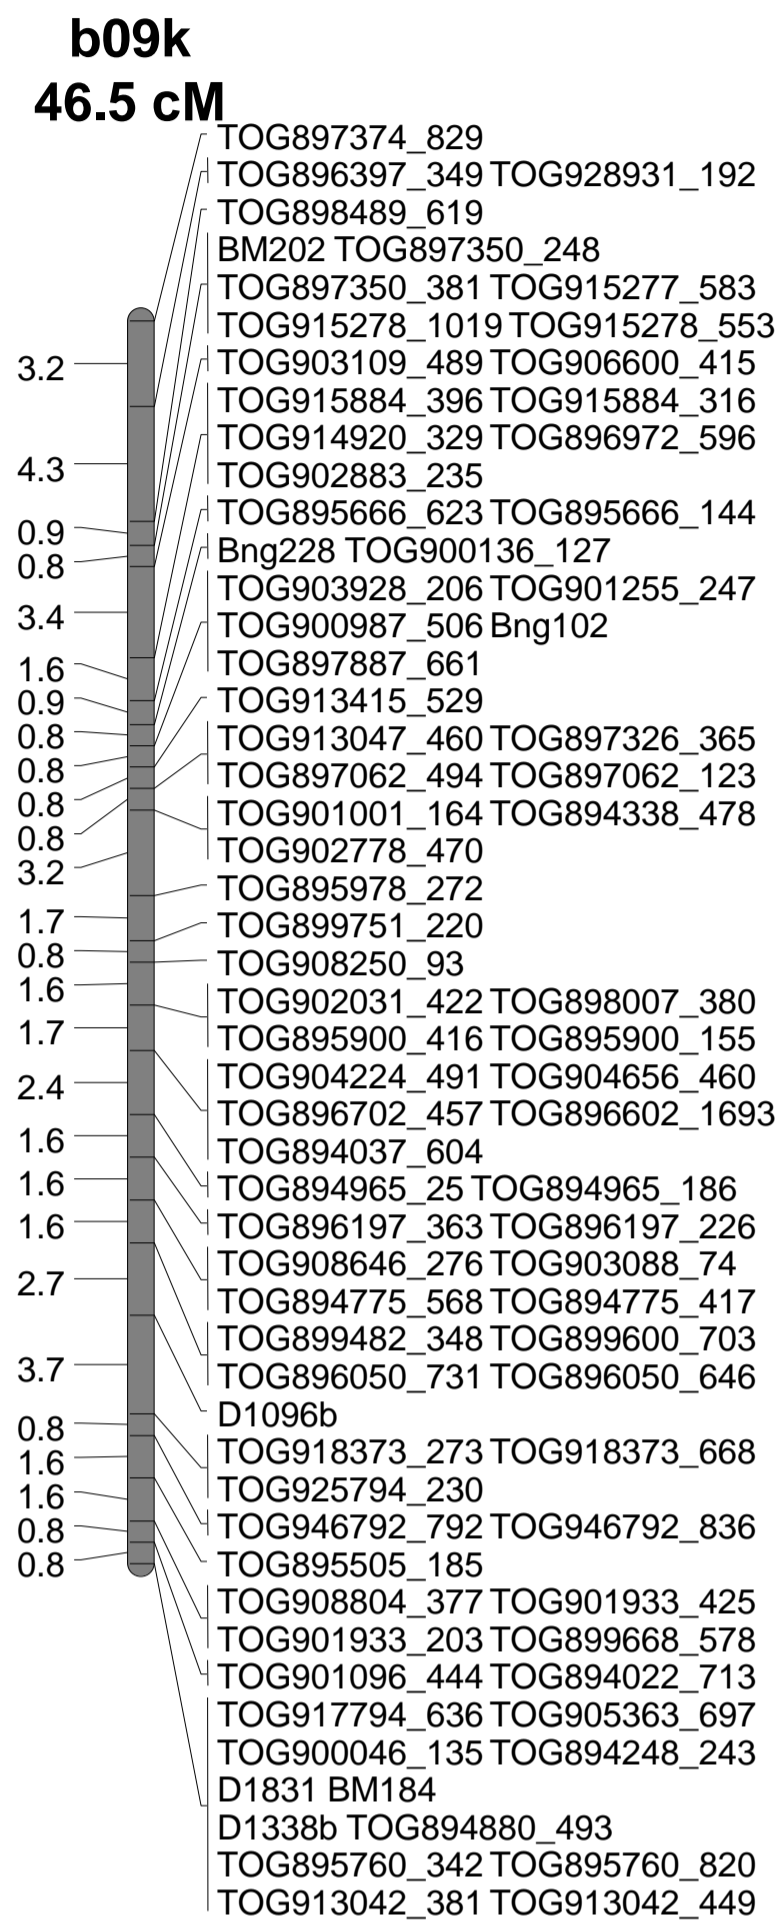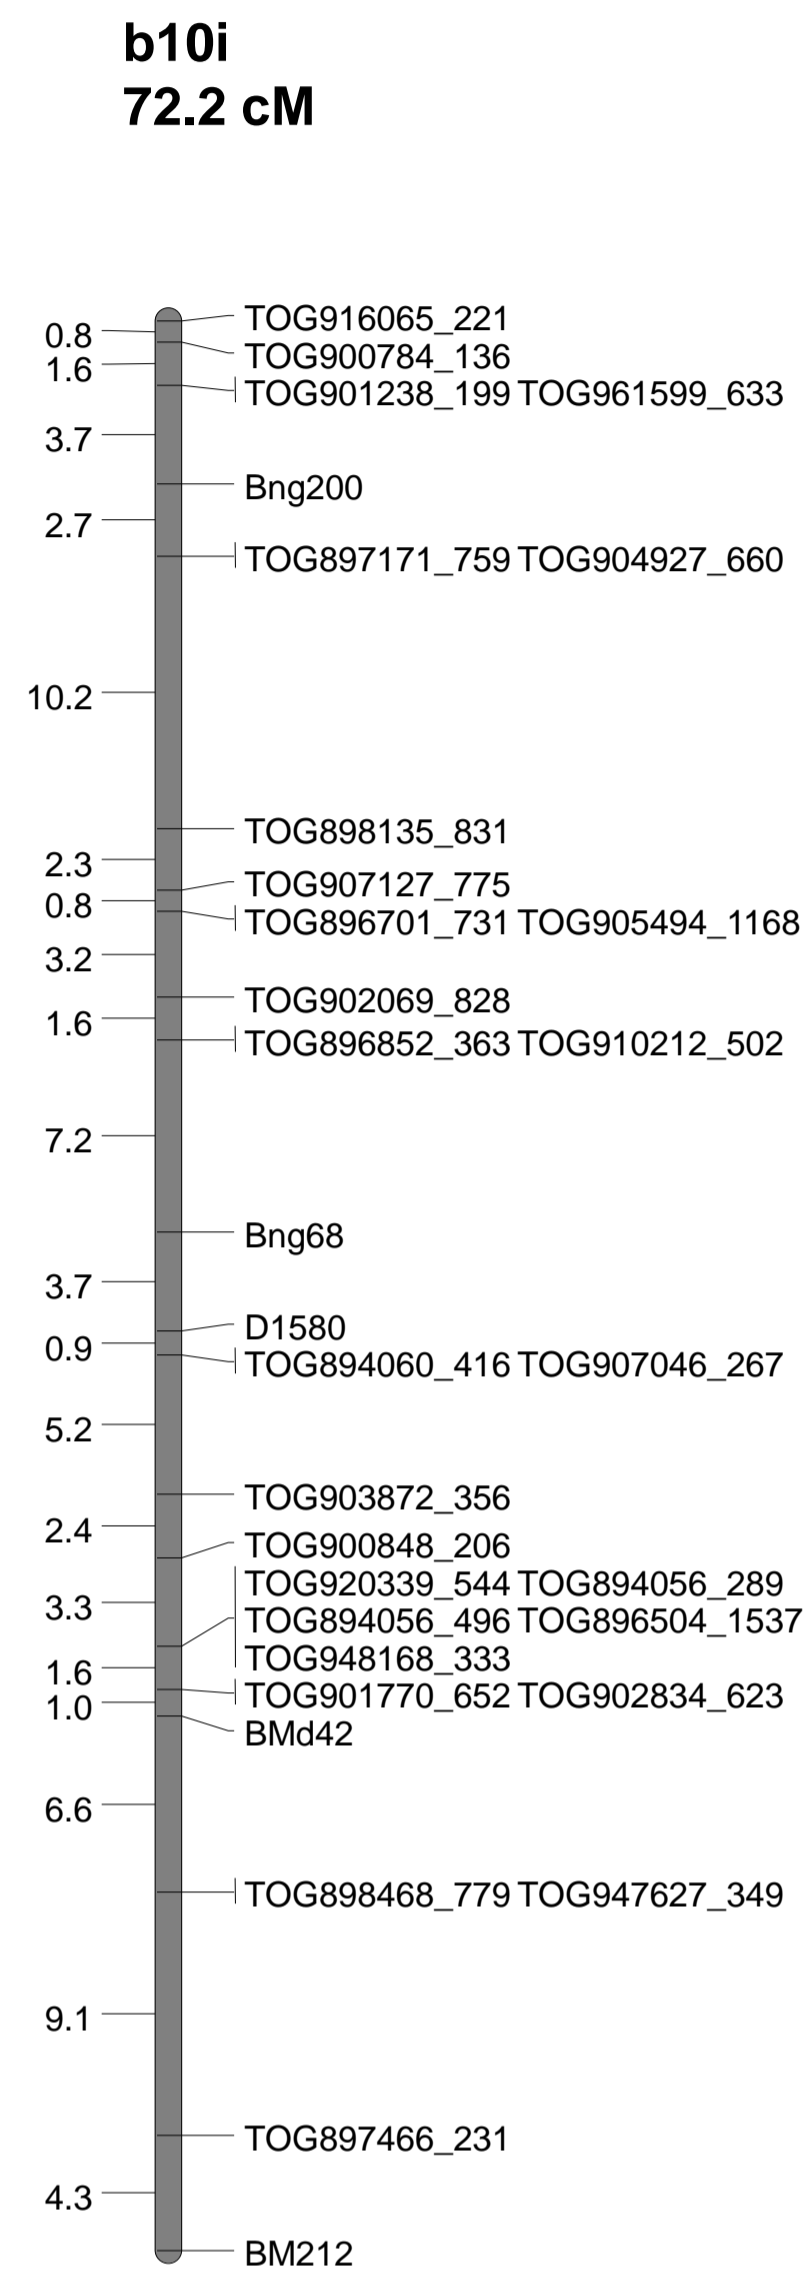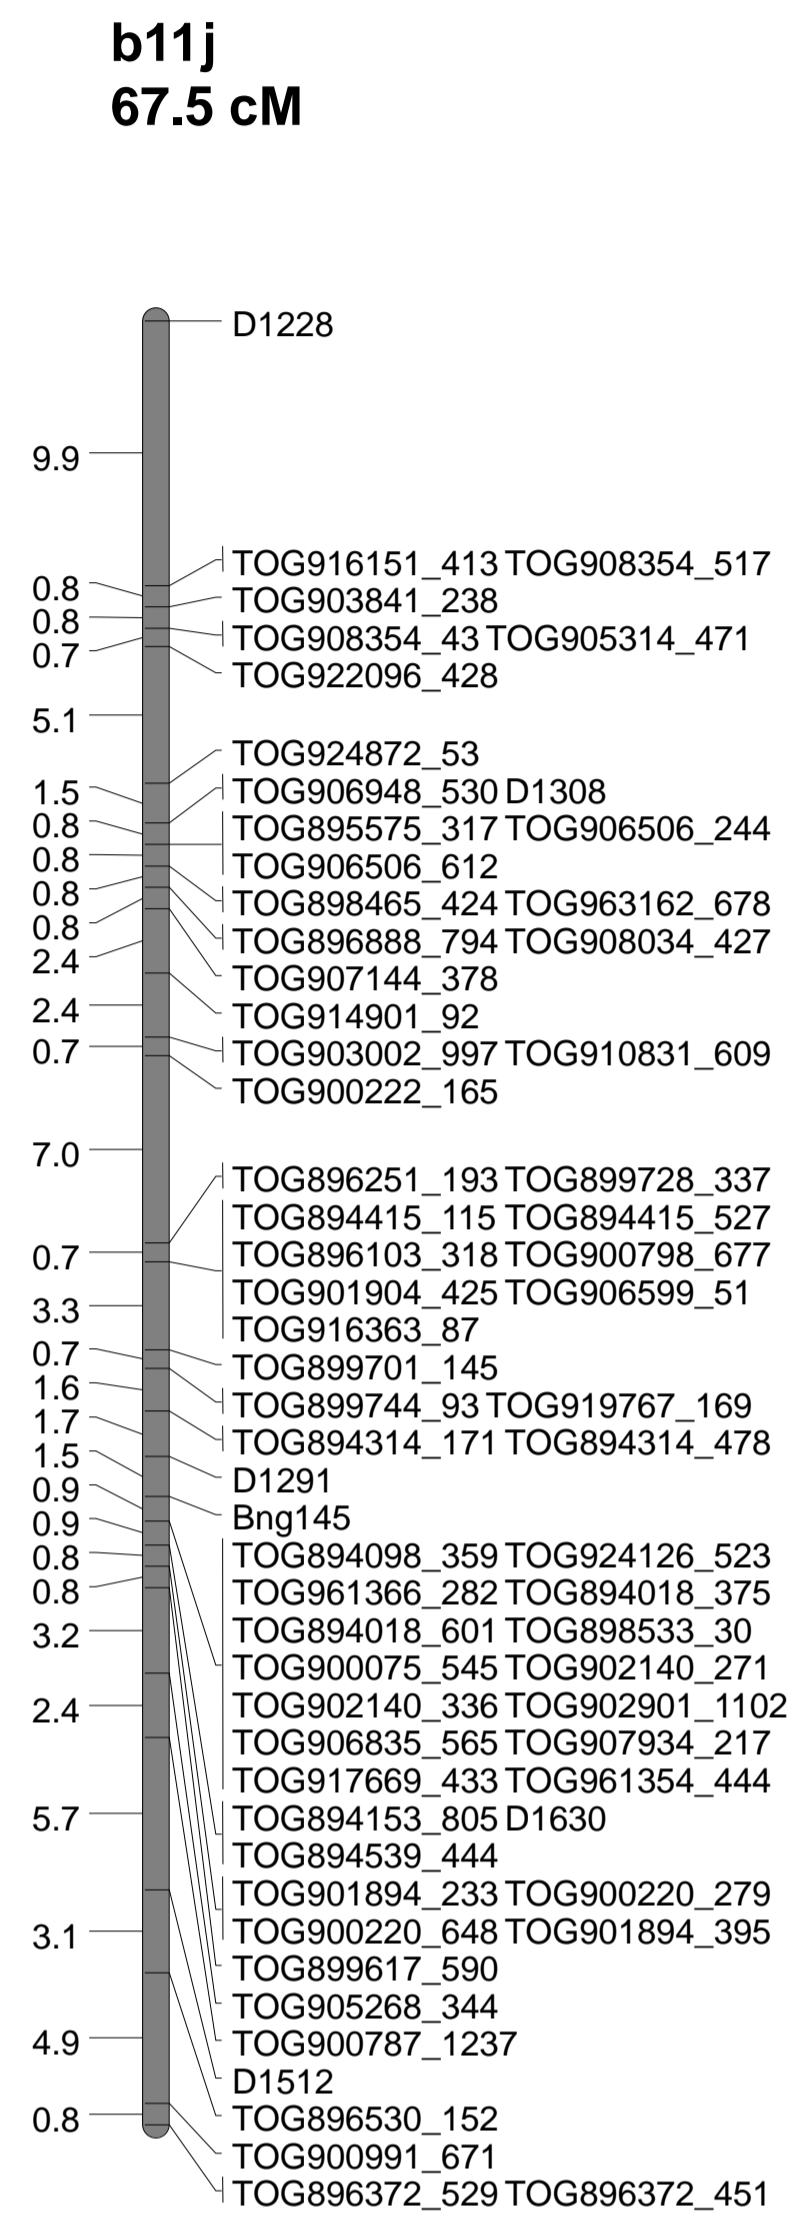

Supplement: pone.0189597.s004.pdf [file pone.0189597.s004.pdf]
