# Supplementary material for: Uneven recombination rate and linkage disequilibrium across a reference SNP map for common bean (Phaseolus vulgaris L.)
Source: PubMed Central journal article supplement (PMC5844515; doi:10.1371/journal.pone.0189597), 2018-03-09

**Pv01**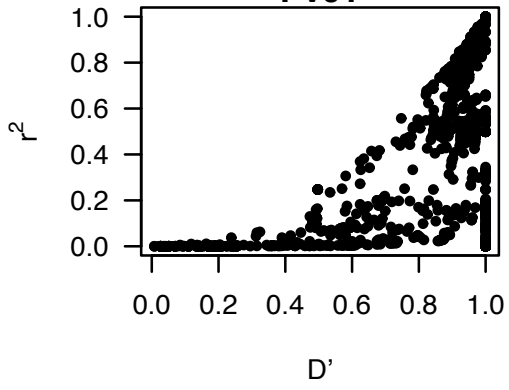**Pv02**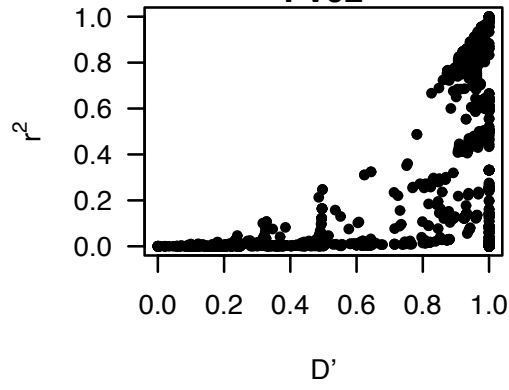**Pv03**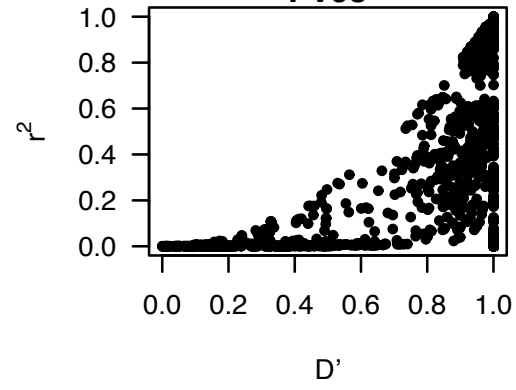**Pv04**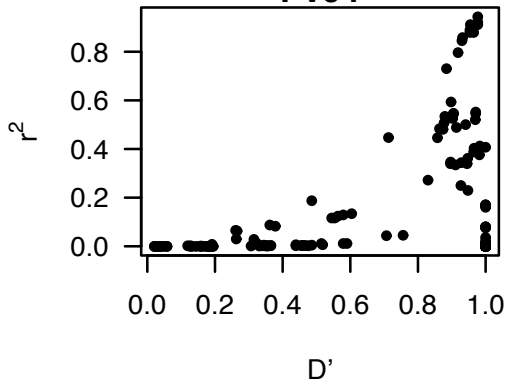**Pv05**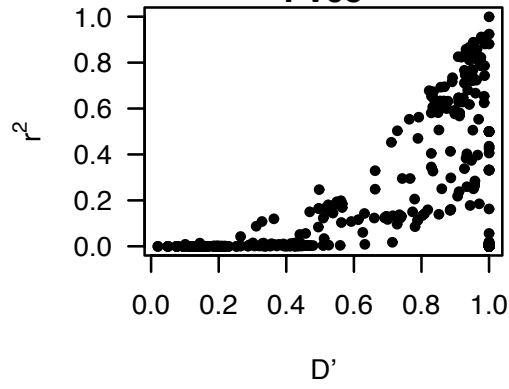**Pv06**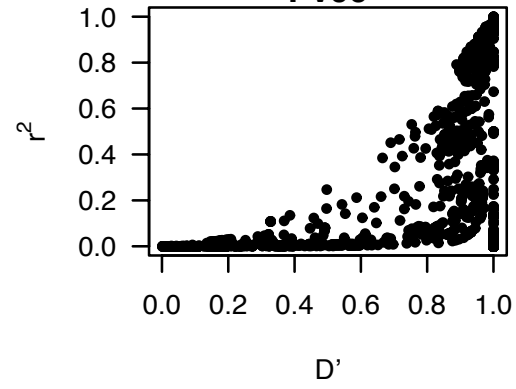**Pv07**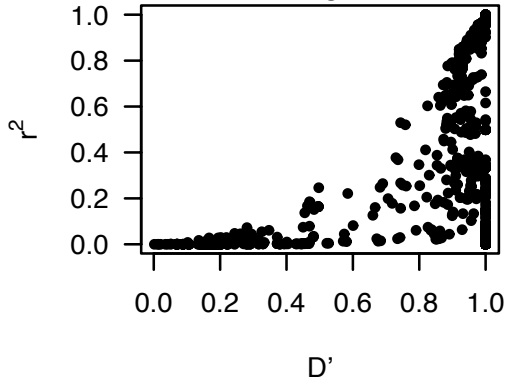**Pv08**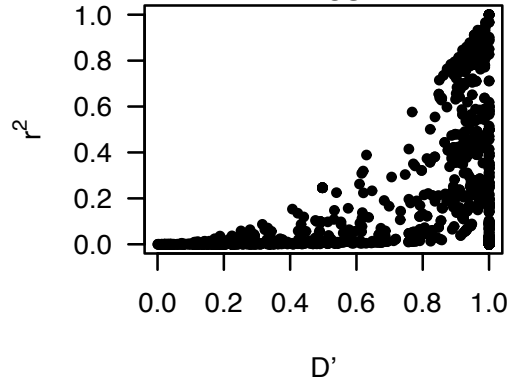**Pv09**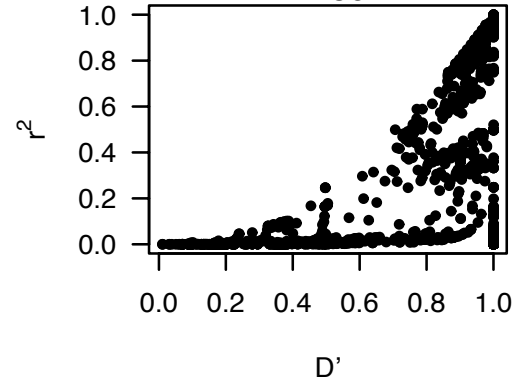**Pv10**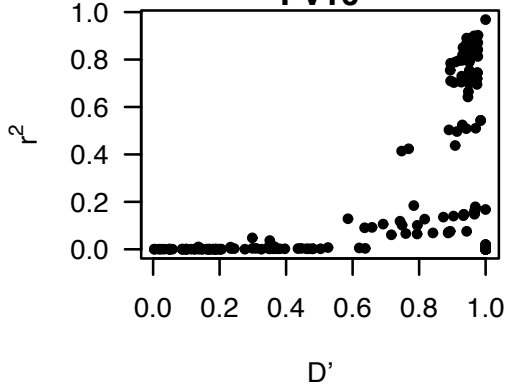**Pv11**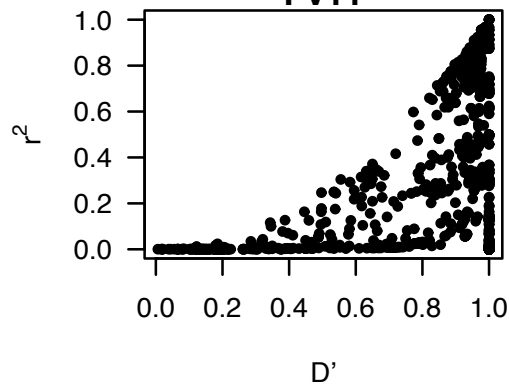

Supplement: pone.0189597.s010.pdf [file pone.0189597.s010.pdf]
